# Supplementary material
Source: publisher figshare collection journal article supplement (https://karger.figshare.com/ndownloader/files/13826990)
Supplement: Supplementary file 1 [file 13826990]

**Supplementary table 1.** Quality assessment of the included case-control and cohort studies according to the Newcastle–Ottawa scale (NOS).

| *Reference* | *Study type* | *Selection* | *Comparability* | *Outcome* |
| --- | --- | --- | --- | --- |
| *Bizzarri et al. [1]* | *Prospective*  *non-randomized*  *case–control study* | ****** | ***** | ***** |
|
| *Sancho et al. [2]* | *Retrospective cohort study* | **** | *** | **** |
|
|
| *Ferrero et al. [3]* | *Retrospective case-control study* | ****** | ***** | ***** |
|
| *Ferrero et al. [4]* | *Retrospective cohort study* | ***** | ***** | ***** |
|
| *Luketic et al. [5]* | *Retrospective cohort study* | ****** | **** | ***** |
| *Murji et al. [6]* | *Prospective*  *multicenter, observational cohort study* | **** | *** | **** |
|

**References**

1. Bizzarri N, Ghirardi V, Remorgida V, Venturini PL, Ferrero S: Three-month treatment with triptorelin, letrozole and ulipristal acetate before hysteroscopic resection of uterine myomas: prospective comparative pilot study. Eur J Obstet Gynecol Reprod Biol. 2015; 192: 22-26

2. Sancho JM, Delgado VS, Valero MJ, Soteras MG, Amate VP, Carrascosa AA: Hysteroscopic myomectomy outcomes after 3-month treatment with either Ulipristal Acetate or GnRH analogues: a retrospective comparative study. Eur J Obstet Gynecol Reprod Biol. 2016; 198: 127-130

3. Ferrero S, Racca A, Tafi E, Alessandri F, Venturini PL, Leone Roberti Maggiore U: Ulipristal Acetate Before High Complexity Hysteroscopic Myomectomy: A Retrospective Comparative Study. J Minim Invasive Gynecol. 2016; 23: 390-395

4. Ferrero S, Alessandri F, Vellone VG, Venturini PL, Leone Roberti Maggiore U: Three-month treatment with ulipristal acetate prior to laparoscopic myomectomy of large uterine myomas: a retrospective study. Eur J Obstet Gynecol Reprod Biol. 2016; 205: 43-47

5. Luketic L, Shirreff L, Kives S, Liu G, El Sugy R, Leyland N, Solnik MJ, Murji A: Does Ulipristal Acetate Affect Surgical Experience at Laparoscopic Myomectomy? J Minim Invasive Gynecol. 2017; 24: 797-802

6. Murji A, Wais M, Lee S, Pham A, Tai M, Liu G: A Multicenter Study Evaluating the Effect of Ulipristal Acetate during Myomectomy. J Minim Invasive Gynecol. 2017, DOI: 10.1016/j.jmig.2017.10.016:
